# Supplementary material for: High-Dimensional Phenotyping Identifies Age-Emergent Cells in Human Mammary Epithelia
Source: PubMed Central journal article supplement — Cell Rep. 2018 Apr 25;23(4):1205–19. doi: 10.1016/j.celrep.2018.03.114 (PMC5946804; doi:10.1016/j.celrep.2018.03.114), 2018-04-25
Supplement: mmc1.pdf [file mmc1.pdf]

**Cell Reports, Volume 23**

**Supplemental Information**

**High-Dimensional Phenotyping Identifies**

**Age-Emergent Cells in Human Mammary Epithelia**

**Fanny A. Pelissier Vatter, Denis Schapiro, Hang Chang, Alexander D. Borowsky, Jonathan K. Lee, Bahram Parvin, Martha R. Stampfer, Mark A. LaBarge, Bernd Bodenmiller, and James B. Lorens**

## Supplemental Information

| Women <30y |        |        |                                                                 | Women >30y and <50y |        |        |                                                          |
|------------|--------|--------|-----------------------------------------------------------------|---------------------|--------|--------|----------------------------------------------------------|
| Sample     | Age, y | Source | Known characteristics/<br>pathology notes                       | Sample              | Age, y | Source | Known characteristics/<br>pathology notes                |
| 48R        | 16     | RM     | African-American                                                | 42P                 | 30     | P      | IDC, lymph node-                                         |
| 160        | 16     | RM     |                                                                 | 169L                | 35     | RM     |                                                          |
| 407P       | 19     | P      | IDC, lymph node+, ER+, PR+                                      | 90P                 | 36     | P      | BRCA-1 mut (185de1AG)                                    |
| 240L       | 19     | RM     | Mildly hyperplastic                                             | 250MK               | 37     | Milk   |                                                          |
| 168R       | 19     | RM     | African-American                                                | 100P                | 39     | P      | Noninvasive ductal carcinoma,<br>ER-, PR-                |
| 399E       | 20     | RM     | Benign                                                          | 6                   | 40     | RM     |                                                          |
| 184        | 21     | RM     |                                                                 | 245AT               | 41     | RM     | ATM heterozygote, tissue was<br>clinically normal tissue |
| 356E       | 21     | RM     | Normal                                                          | 173P                | 45     | P      |                                                          |
| 001P       | 24     | P      | IDC, lymph node-                                                | 173T                | 45     | Tumor  | IDC, ER-, PR-                                            |
|            |        |        | African-American, mammary<br>hyperplasia                        | 208                 | 45     | RM     |                                                          |
| 123        | 27     | RM     |                                                                 | 2                   | 46     | RM     |                                                          |
| 195L       | 27     | RM     |                                                                 | 60R                 | 47     | RM     |                                                          |
| 97         | 27     | RM     |                                                                 | 30                  | 49     | RM     |                                                          |
| 51L        | 28     | RM     | Mild periductal mastitis (R+L)<br>focal microcalcification (R.) |                     |        |        |                                                          |
|            |        |        | Minimal phase of fibrocystic<br>disease                         |                     |        |        |                                                          |
| 172L       | 28     | RM     |                                                                 |                     |        |        |                                                          |
| 676P       | 29     | P      |                                                                 |                     |        |        |                                                          |
| 124        | 29     | RM     |                                                                 |                     |        |        |                                                          |

  

| Women >50y |        |        |                                                                                                                                                                | Breast Epithelia Samples |        |        |
|------------|--------|--------|----------------------------------------------------------------------------------------------------------------------------------------------------------------|--------------------------|--------|--------|
| Sample     | Age, y | Source | Known characteristics/<br>pathology notes                                                                                                                      | Sample                   | Age, y | Source |
| 178R       | 51     | RM     |                                                                                                                                                                | 404EB                    | 19     | RM     |
|            |        |        | Slight fibrocystic disease,<br>hypertrophy, stromal fibrosis<br>and adenosis present in<br>mammary parenchyma                                                  | 399E                     | 20     | RM     |
| 191L       | 56     | RM     |                                                                                                                                                                | 472ER                    | 21     | RM     |
| 117R       | 56     | RM     | Patchy stromal fibrosis (R.),<br>fibrocystic disease (L.)                                                                                                      | 620EL                    | 22     | RM     |
| 335R       | 58     | P      | Infiltrating adenocarcinoma,<br>ER+, PR+/-                                                                                                                     | 483EHRA                  | 26     | RM     |
| 153L       | 60     | RM     | Benign fibrocystic disease                                                                                                                                     | 400ER                    | 27     | RM     |
| 639P       | 60     | P      |                                                                                                                                                                | 437E                     | 29     | RM     |
|            |        |        | Fibrocystic disease,<br>hypertrophy, apocrine<br>metaplasia of ductal epithelium,<br>cystic dilatation of ducts, and focal<br>areas of intraductal hyperplasia | 334ER                    | 55     | RM     |
| 122L       | 62     | RM     |                                                                                                                                                                | 337ER                    | 57     | RM     |
| 881P       | 65     | P      |                                                                                                                                                                | 563HRR                   | 61     | RM     |
| 96R        | 66     | RM     | Slight focal fibrocystic change                                                                                                                                | 395C                     | 62     | RM     |
| 29         | 68     | RM     |                                                                                                                                                                | 429EL                    | 72     | RM     |
|            |        |        | Colloid (mucinous) carcinoma,<br>ER+/-, PR-                                                                                                                    | 368E                     | 73     | RM     |
| 353P       | 72     | P      |                                                                                                                                                                |                          |        |        |
| 429ER      | 72     | RM     |                                                                                                                                                                |                          |        |        |
| 464P       | 80     | P      |                                                                                                                                                                |                          |        |        |
| 451P       | 83     | P      |                                                                                                                                                                |                          |        |        |
| 805P       | 91     | P      |                                                                                                                                                                |                          |        |        |

**Table S1. HMEC and uncultured breast epithelia samples (Related to Figure 1).** HMEC strains and uncultured breast epithelia samples were derived from reduction mammoplasty (RM), peripheral non-tumor regions from mastectomy (P) tissues, milk fluids (Milk) and a tumor (T). The name of the HMEC strain, the age at the time of surgery and the characteristics are indicated.

| Isotope | Antigen          | Antibody raised against | Pathway                               | References                                       | Clone         | Supplier   | Final Concentration ug/mL |
|---------|------------------|-------------------------|---------------------------------------|--------------------------------------------------|---------------|------------|---------------------------|
| ER 170  | K14              | Total                   | Myoepithelial marker                  | (Villadsen et al., 2007)                         | polyclonal    | Thermo     | 0.25                      |
| PR 141  | K5/6             | Total                   | Myoepithelial marker                  | (LaBarge et al., 2007)                           | D5            | Millipore  | 4                         |
| DY 163  | K19              | Total                   | Luminal marker                        | (Villadsen et al., 2007)                         | Tromall       | DSHB       | 2                         |
| DY164   | K7               | Total                   | Luminal marker                        | (Taylor-Papadimitriou et al., 1989)              | RCK105        | BD         | 0.5                       |
| YB 174  | K8/18            | Total                   | Luminal marker                        | (Villadsen et al., 2007)                         | C51           | CST        | 2                         |
| YB 173  | CD133            | Total, epitope 1        | Luminal marker                        | (dos Santos et al., 2013)                        | AC133         | Miltenyi   | 0.5                       |
| GD 161  | cKit             | Total                   | Progenitor marker                     | (Lim et al., 2009; Regan et al., 2012)           | 104D2         | Biologend  | 4                         |
| ER 168  | Axl              | Total                   | Stemness                              | (Asiedu et al., 2014)                            | 1H12          | BergenBio  | 4                         |
| GD 160  | CD44             | Total, surface          | Stemness, migration                   | (Hebbard et al., 2000; Louderbough et al., 2011) | IM7           | BD         | 0.1                       |
| HO 165  | HER2             | C terminal 1242-1255    | Proliferation                         | (Rubin, Yarden, 2001; Yarden, 2011)              | 3B5           | BD         | 4                         |
| ER 167  | YAP              | C terminal 379-407      | Hippo                                 | (Zhao et al., 2010; Vlug et al., 2013)           | H9            | Santa Cruz | 4                         |
| ND148   | MST1             | aa475-505               | Hippo                                 | (Zhao et al., 2010)                              | polyclonal    | LS-Bio     | 8                         |
| SM149   | LATS1            | N-terminus              | Hippo                                 | (Zhao et al., 2010)                              | polyclonal    | LS-Bio     | 8                         |
| DY 162  | MST2             | Total                   | Hippo                                 | (Zhao et al., 2010)                              | polyclonal    | LS-Bio     | 8                         |
| LA 139  | pCreb            | pS133                   | Survival                              | (Dietze et al., 2005)                            | J151-21       | BD         | 4                         |
| ND 144  | pMEK1/2          | pS221                   | Myoepithelial contractility           | (Pasic et al., 2011)                             | 166F8         | CST        | 6                         |
| ND 145  | pStat3           | pY705                   | Involution                            | (Haricharan and Li, 2014)                        | 4/pStat3      | BD         | 4                         |
| ND 146  | pStat5           | pY694                   | Lobuloalveolar development            | (Gallego et al., 2001; Barash, 2006)             | 47            | BD         | 4                         |
| ND150   | pNFkB            | pS529                   | Mammary gland morphogenesis           | (Brantley et al., 2001)                          | K10-895.12.50 | BD         | 2                         |
| EU 151  | pEGFR            | pY1068                  | Myoepithelial contractility           | (Pasic et al., 2011; Paszek et al., 2005)        | Y38           | Abcam      | 2                         |
| SM152   | pStat1           | pY701                   | Tumor suppressor                      | (Chan et al., 2012; Haricharan and Li, 2014)     | 4a            | BD         | 8                         |
| EU 153  | pAkt             | pS473                   | Survival                              | (Watson, 2006)                                   | D9E           | CST        | 4                         |
| SM 154  | pErk1/2          | pT202/pY204             | Myoepithelial contractility           | (Pasic et al., 2011)                             | 20A           | BD         | 4                         |
| GD 158  | pGsk3            | pS9 (Inactivation)      | Milk synthesis and cell proliferation | (Demboway et al., 2015)                          | D85E12        | CST        | 2                         |
| TM169   | pPLCgamma2       | pY759                   | Myoepithelial contractility           | (Raymond et al., 2011; Reversi et al., 2005)     | K86-689.37    | BD         | 1                         |
| YB 171  | pS6              | pS235/pS236             | Survival                              | (Fu et al. 2015; Tumaneng et al. 2012)           | N7-548        | BD         | 0.2                       |
| GD156   | Cyclin B1        | Total                   | Proliferation                         | (Jin et al., 1998)                               | GNS-11        | BD         | 2                         |
| LU 175  | pRb              | pS807/811               | Proliferation                         | (Giacinti and Giordano, 2006)                    | D20B12        | CST        | 0.5                       |
| YT 172  | Cleaved caspase3 | Cleaved@D175            | Apoptosis                             | (Watson, 2006)                                   | 5A1E          | CST        | 4                         |

**Table S2. Antibody panel (Related to Figure 1).** A panel of 29 antibodies is shown, comprising 10 highly informative surface markers, 12 antibody probes against intracellular phosphorylation, 4 antibody probes against the Hippo pathway and 3 antibody probes against cell cycle and apoptosis pathway. Each antibody clone, supplier, epitope and conjugated isotope is indicated. All the antibodies have been previously validated and titrated. References for relevant pathways in the regulation of HMEC are indicated.

# Figure S1

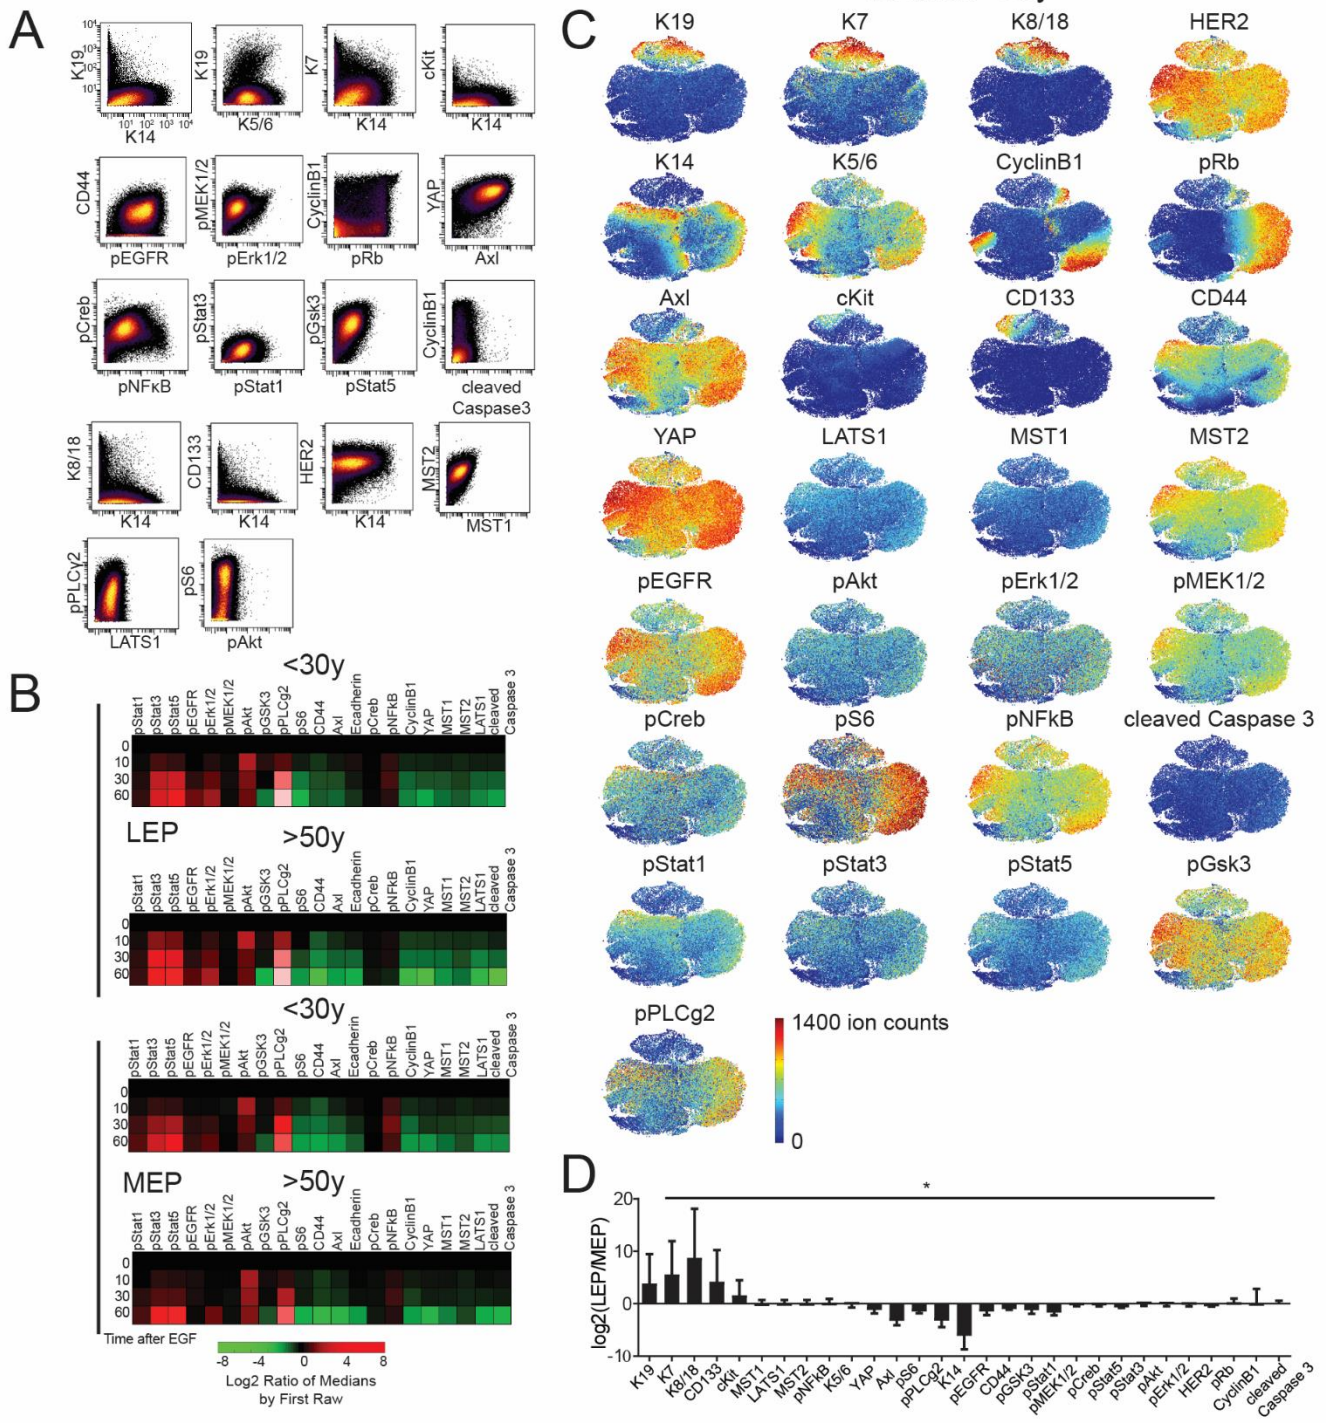

**Figure S1. Validation of the antibody panel (Related to Figure 1 and 2).** The antibody panel has been extensively validated and titrated (data not shown). The raw data has been transformed with arcsinh with the cofactor of 5. (A) To illustrate the functionality of each metal-conjugated

antibody, representative biaxial plots show staining profiles of the antibodies used in women <30y (merged, N=16), ranging from  $10^0$  to  $10^4$  ion counts per cell. (B) Heatmaps of marker expression in HMEC from three <30y and >50y women treated with EGF and vanadate for 60min, manually gated after tSNE projection. At, t=0, 10, 30 and 60min cells were harvested and analyzed with mass cytometry using barcoding and a panel of 23 antibody probes. The fold change of marker expression is ranged from the lowest (green) to the highest (red). This experiment validates the signaling pathway antibodies. (C) tSNE maps from HMEC from women <30y (merged, N=16). Only 50'000 cells are subsampled for display. The marker expression is ranged from 0 (blue) to 1400 ion counts (red). (D)  $\text{Log}_2$  fold change in marker expression of LEP over MEP manually gated from tSNE. Paired student t-test was performed on median of protein expression in LEP vs MEP before logarithm transform, \*  $p<0.05$  N=16.



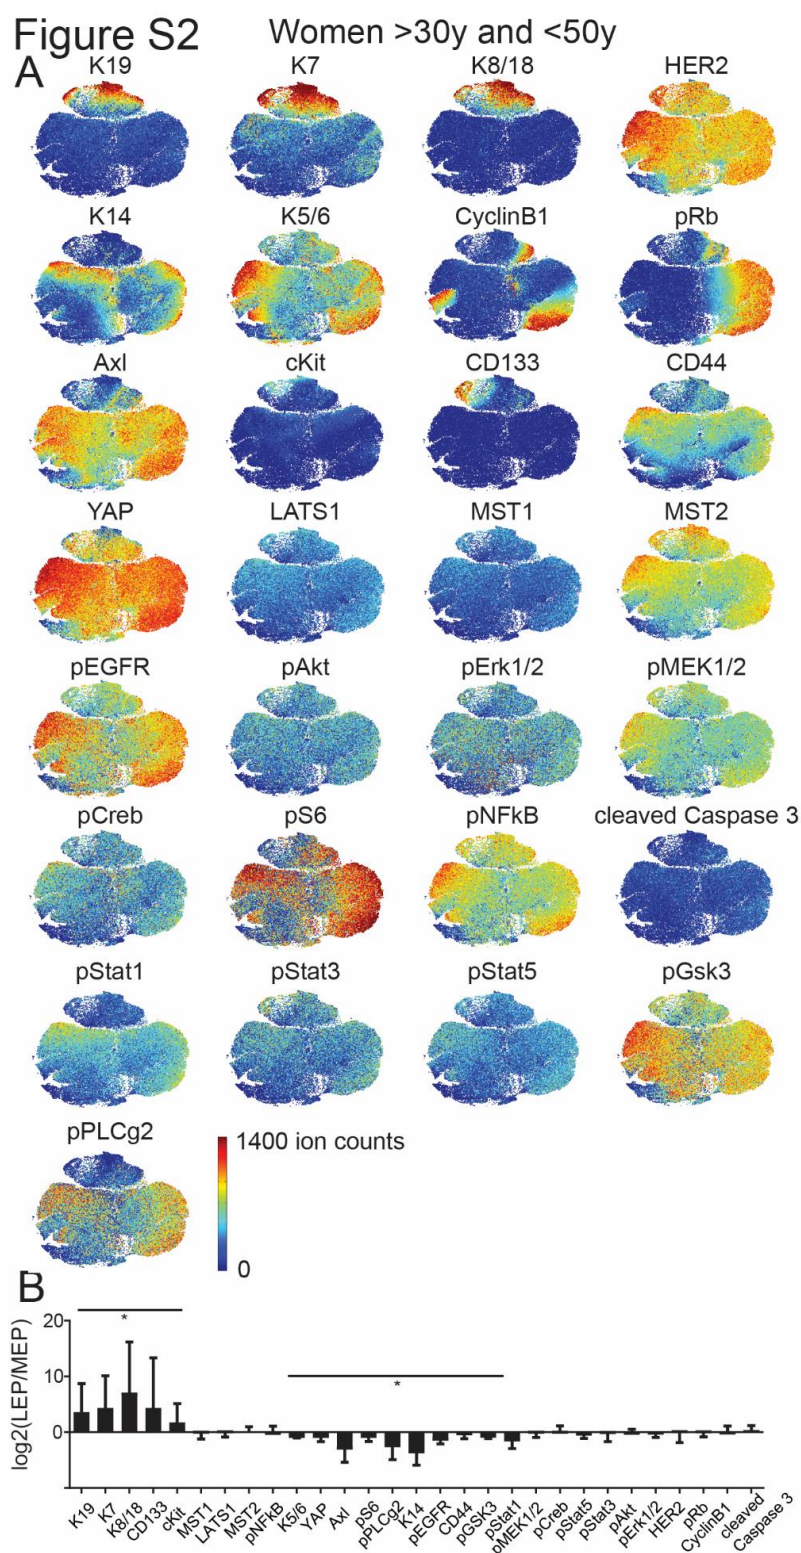

**Figure S2. Luminal and myoepithelial lineages exhibit a phenotypic divergence in women >30 and <50y (Related to Figure 2).** (A) tSNE maps from HMEC from women >30y and <50y (merged and subsampled at 50'000 cells, N=9). The marker expression is ranged from 0 (blue) to 1400 ion counts (red). (B) Log<sub>2</sub> fold change in marker expression of LEP over MEP manually gated from tSNE. Four abnormal samples were excluded: a sample from milk fluid (250MK), two samples bearing BRCA1 or ATM mutation (90P and 245AT), and one sample from a tumor (173T). Paired student t-test was performed on median of protein expression in LEP vs MEP before logarithm transform. The non-significance was due to a lower sample number (N=9) in addition to age-related changes. Student t-test \* p<0.05 N=9.

Figure S3

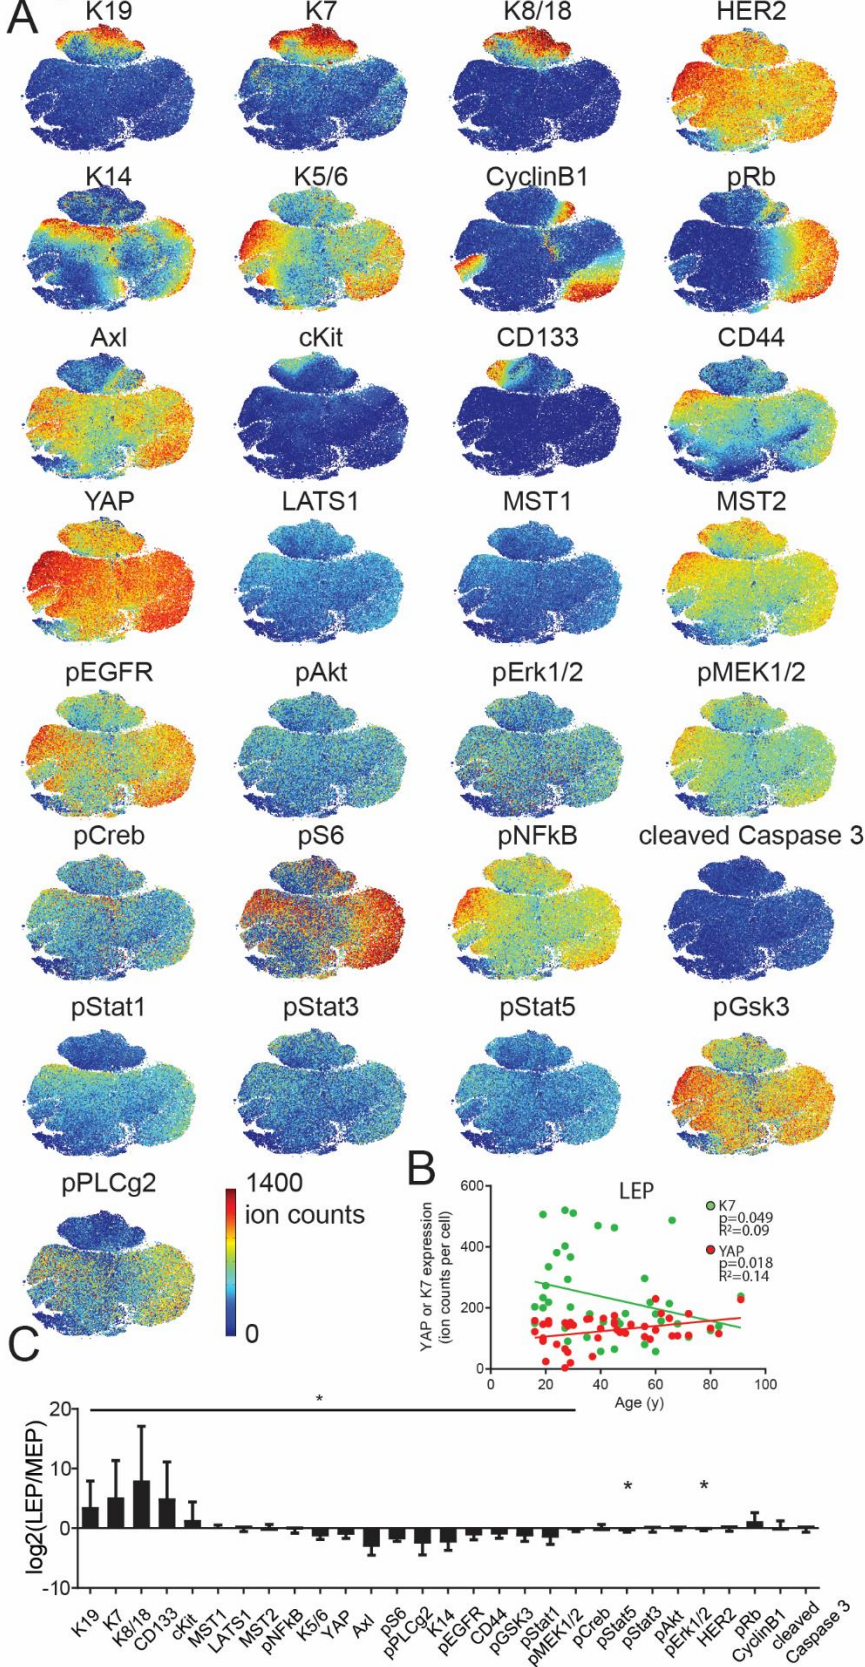

**Figure S3. Luminal and myoepithelial lineages exhibit a phenotypic divergence in women >50y (Related to Figure 2).** (A) tSNE maps from HMEC from women >50y (merged and subsampled at 50'000 cells, N=15). The marker expression is ranged from 0 (blue) to 1400 ion counts (red). (B) Linear regression of K7 and YAP expression in LEP as a function of age. (C) Log<sub>2</sub> fold change in marker expression of LEP over MEP manually gated from tSNE. Paired student t-test was performed on median of protein expression in LEP vs MEP before logarithm transform, \* p<0.05 N=15.



# Figure S4

**A**

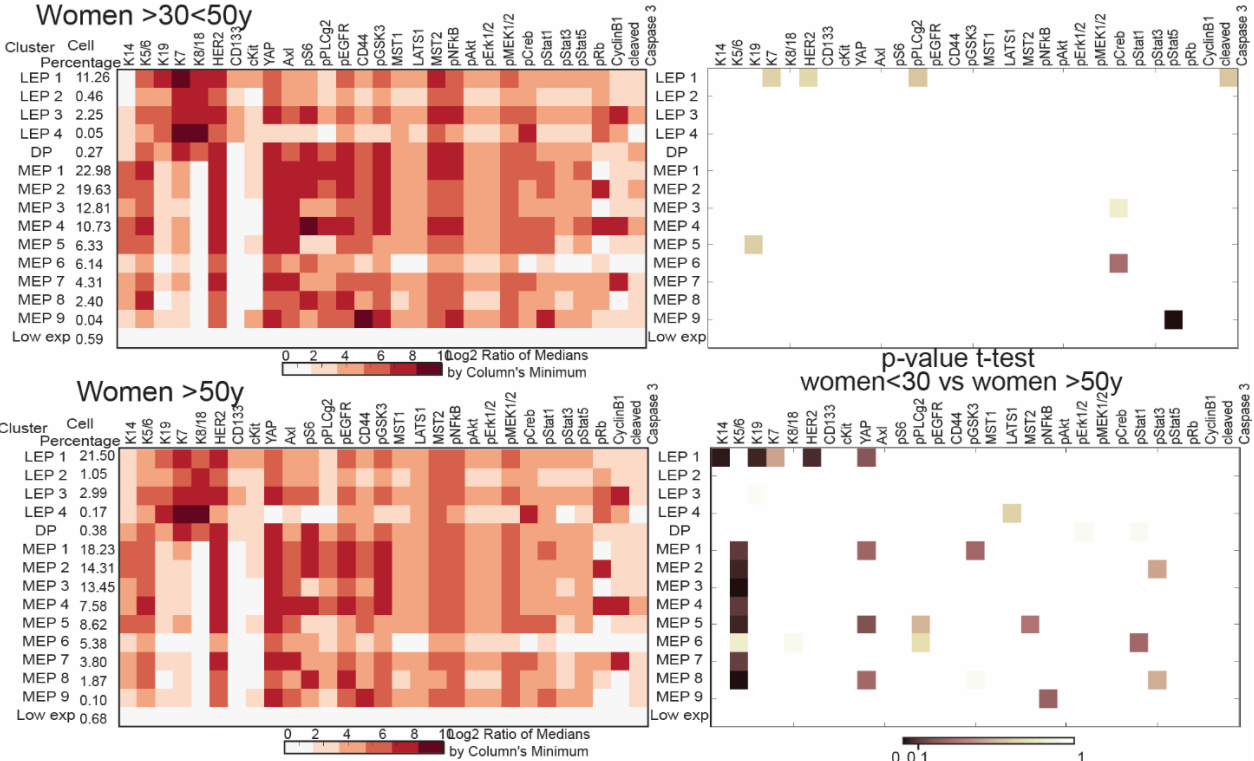

**B**

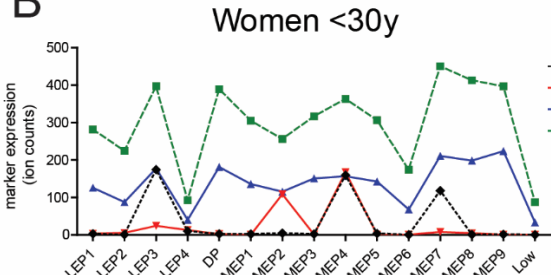

**C**

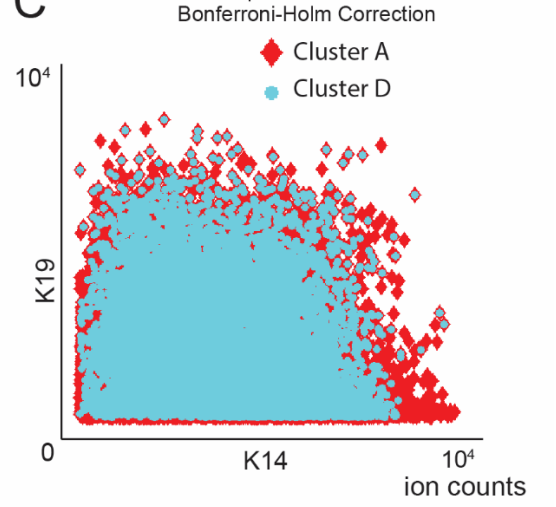

**D**

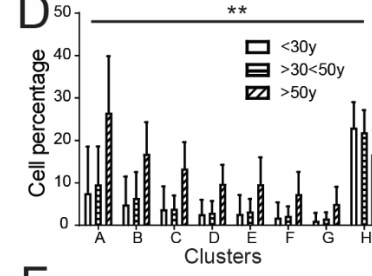

**E**

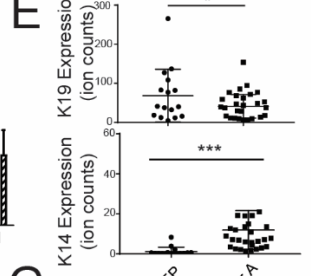

**F**

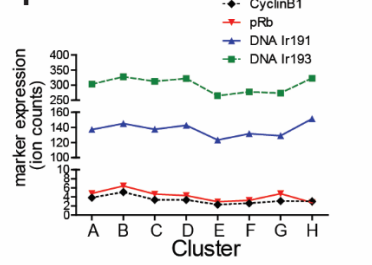

**G**

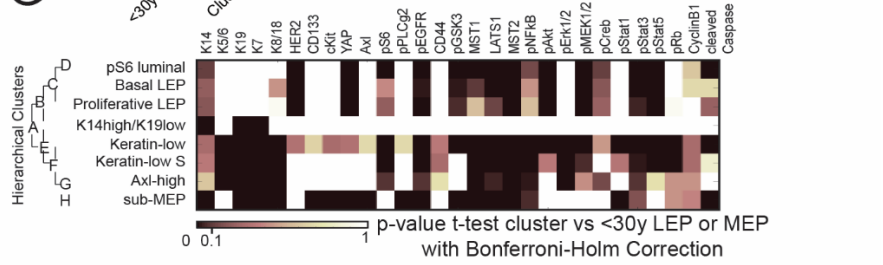



**Figure S4. PhenoGraph analysis identified lineage-specific subsets (Related to Figure 3).** (A) Heatmaps of marker expression of each cluster identified with PhenoGraph of HMEC from women >30 and <50y and women >50y with their associated p-values with Bonferroni-Holm correction of student t-tests. (B) Plots show CyclinB1 (black dashed line), pRb (red plain line), Iridium 191 labeling DNA (blue plain line) and Iridium 193 labeling DNA (green dashed line) intensity (ion counts) in each cluster identified with PhenoGraph. LEP3, MEP4 and MEP7 had the highest Cyclin B1 expression which correlated with higher Iridium intensity, thus DNA content, as compared to the other clusters. (C) Scatter plot shows the expression of K14 and K19 in Citrus cluster A (red diamonds) and D (blue dots) to illustrate that cells from cluster D belong to cluster A by hierarchical clustering and thus are superposed onto cells from cluster A. (D) Plots of cell percentage in each Citrus cluster. Four abnormal samples were excluded: 250MK, 90P and 245AT, 173T. (E) Plots show the median expression of K19 and K14 in <30y LEP (n=16) and the cluster A of the Citrus tree (N=40). t-test \*\*\* p<0.0001, \* p=0.0433. (F) Plots show CyclinB1 (black dashed line), pRb (red plain line), Iridium 191 labeling DNA (blue plain line) and Iridium 193 labeling DNA (green dashed line) intensity (ion counts) in each cluster identified with Citrus. (G) Heatmaps show the p-values with Bonferroni-Holm correction from student t-tests of each marker expression of Citrus clusters vs LEP or MEP <30y.

# Figure S5

## A

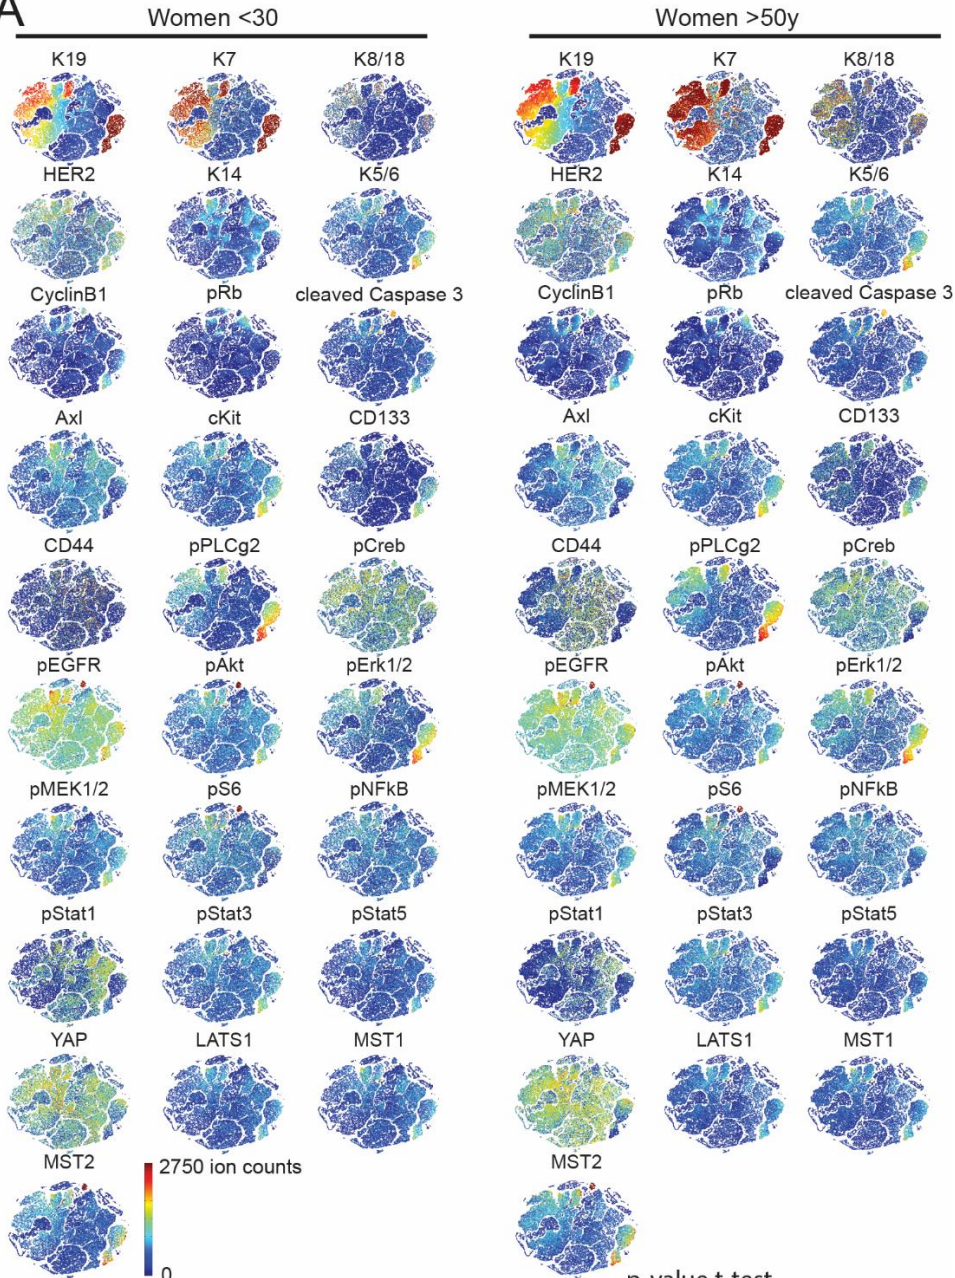

## B

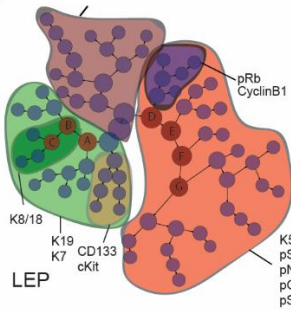

## C

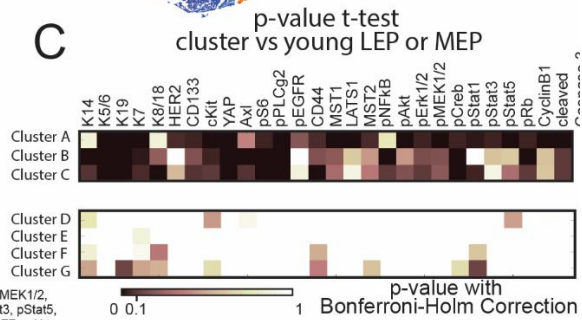

**Figure S5. High dimensional analysis of cellular heterogeneity within primary human breast epithelia (Related to Figure 5).** (A) tSNE maps of breast epithelia from women <30y (merged, and subsampled at 50'000 cells, N=7) and women >50y (merged, and subsampled at 50'000 cells, N=6). The marker expression is ranged from 0 (blue) to 2750 ion counts (red). (B) Hierarchical tree of agglomerative clusters obtained with the Citrus analysis. Node sizes are scaled on the basis of frequency of cells in each cluster. Major cell compartments are contoured on the basis of expression of canonical markers. (C) Heatmaps show the p-values with Bonferroni-Holm correction from student t-tests of each marker expression of Citrus clusters vs LEP or MEP <30y.

**Figure S6**

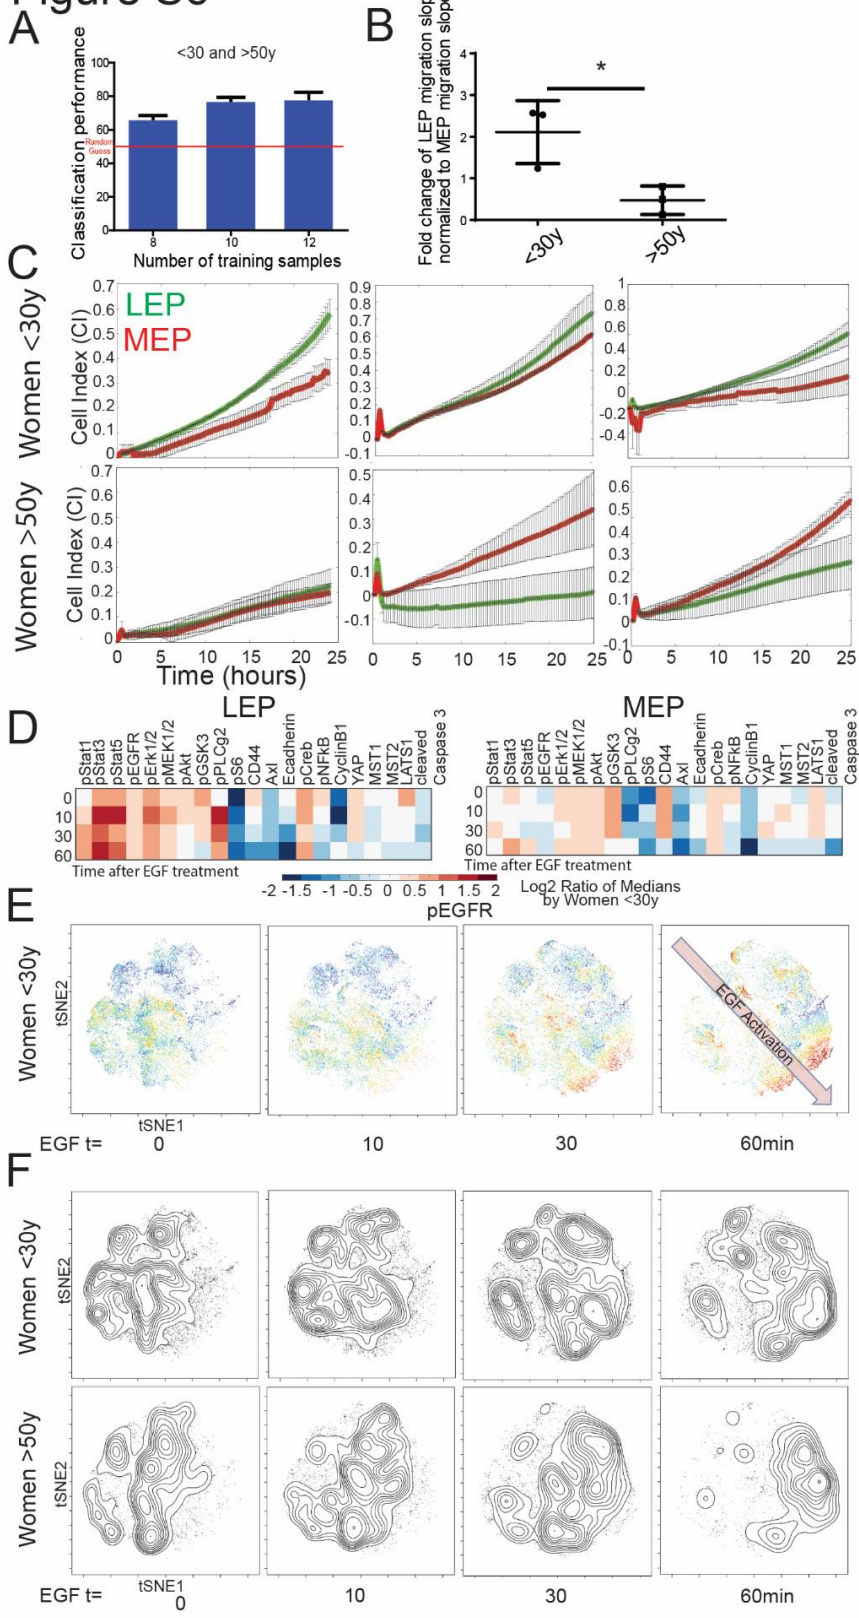



**Figure S6. Evidence of newly acquired functional properties in luminal epithelial cells with age (Related to Figure 6; experimental procedures; data analysis).** (A) Citrus classification performance using 8, 10 or 12 training samples. (B) Plots show the fold change of LEP cell migration index (CI) slope normalized to MEP CI migration slope in women <30y and >50y (N=3, p=0.0269). (C) Graphs show CI measured with xCELLigence instrument every 15min for 25h in FACS sorted LEP and MEP from HMEC from three women <30y and from three women >50y. (D) HMEC from three <30y and >50y women were treated with EGF and vanadate for 60min. Heatmaps of marker expression in LEP and MEP manually gated after tSNE projection. Data was normalized to values from <30y women to highlight age-related changes. The log<sub>2</sub> fold change is ranged from the lowest (blue) to the highest (red). (E) tSNE maps of HMEC from women <30y at t=0, 10, 30 and 60min. pEGFR expression from the lowest (blue) to the highest (red) is shown to highlight the movement of HMEC in the phenotypical space upon EGF activation. (F) Density plots in the tSNE phenotypic space exhibited a stronger response in women >50y upon EGF activation. Data are means +/- SEM.

Figure S7

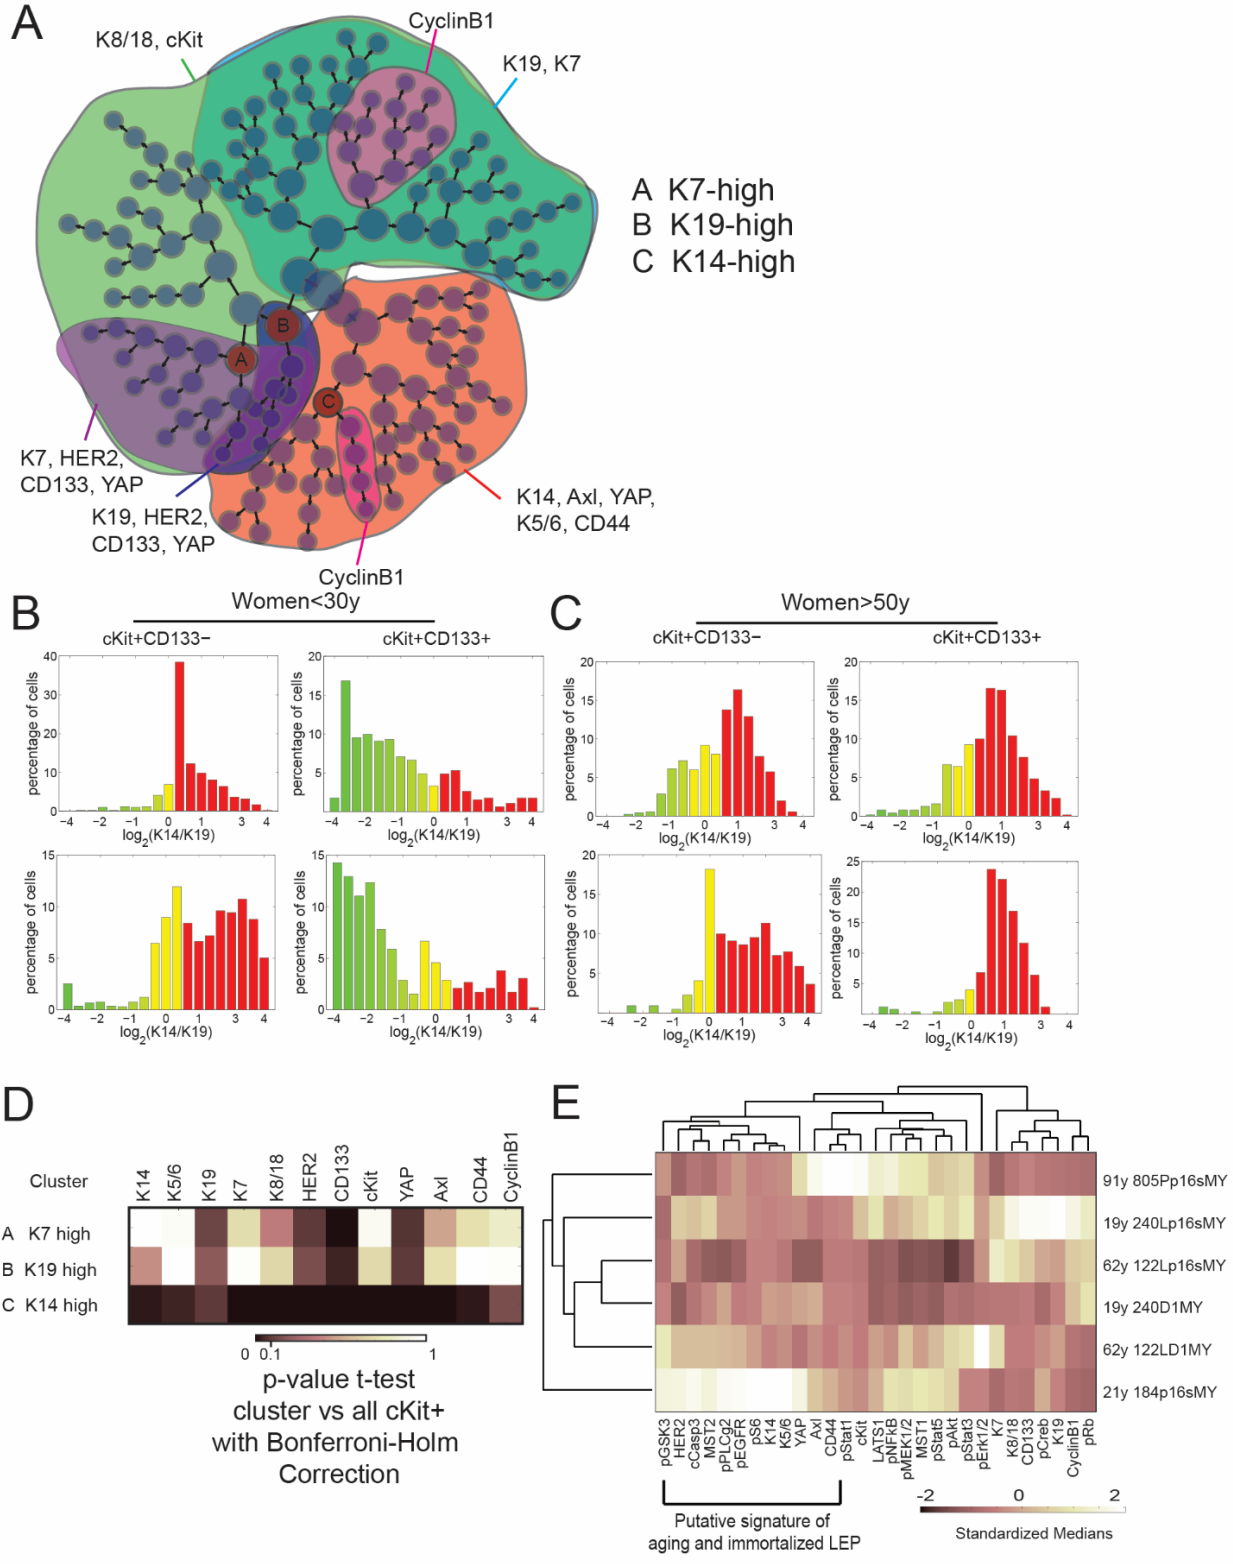

**Figure S7. Evidence of phenotypic divergence in luminal progenitors with age (Related to Figure 6).** (A) Visual representation of unsupervised hierarchical clustering of cKit+ progenitors HMEC with Citrus (N=6). Node sizes are scaled on the basis of frequency of cells in each cluster. Major cell compartments are contoured on the basis of expression of canonical markers. The three clusters changing in abundance with age are shown. (B) Histograms represent log<sub>2</sub>-transformed ratios of K14 to K19 protein expression in single cells of acini from two women <30y (124, 29y and 160, 16y) and (C) from two women >50y (335R, 58y and 353P, 72y), histograms are heat-mapped to indicate cells with the phenotypes of K14-/K19+ LEP (green), K14+/K19+ progenitors (yellow), and K14+/K19- MEP (red). (D) Heatmap shows the p-values with Bonferroni-Holm correction from student t-tests of each marker expression of Citrus clusters vs LEP or MEP <30y. (E) Heatmap of marker expression of each immortalized strain, z-score normalized and hierarchically ordered. The fold change of marker expression is ranged from the lowest (black) to the highest (white).

### **Supplemental Experimental Procedures**

**Generation of immortal cell lines** – Finite lifespan HMEC from specimens 184, 240L, 122L, and 805P were obtained from reduction mammoplasty tissues or peripheral to mastectomy tissues (i.e. 805P). HMEC were grown in M87A supplemented with CT at 0.5 ng/ml, and X (Bachem) at 0.1 nM. Retroviral vectors: The p16 shRNA was in the MSCV vector, c-Myc was in the pBabe-hygro (BH2) or LXSXN vector. Retroviral stocks were generated from supernatants collected in M87A medium. Strains 240L, 122L, and 805P at passage 3 or and 184 at passage 4 were transduced with MSCV-p16sh or MSCV control and selected with puromycin. At the next passage, after puromycin selection, the p16sh transduced cells were transduced with c-Myc pBabe-hygro (c-myc LXSXN for 184) and selected with hygromycin. Vector only control pre-stasis cells entered stasis at passage 12-15, whereas the immortalized lines continued to grow.

**Mass cytometry analysis.** The age of the strains were not known at the time of the experiment. Cells were analyzed on a CyTOF mass cytometer (DVS Sciences) at an event rate of ~500 cells per second. The settings of the instrument and the initial post-processing parameters were described previously. For each barcoded sample several data files were recorded. The files were concatenated using the Cytobank concatenation tool, normalized and debarcoded.

**Flow Cytometry** – HMEC at fourth passage were trypsinized and resuspended in their media. For enrichment of progenitor, luminal or myoepithelial lineages, anti -CD133-PE-Vio615 (Myltenyi clone AC133, 1:50) anti -CD117-PE (BioLegend, clone 104D2, 1:200), or anti-CD227-FITC (BD; cloneHMPV;1:50), anti-CD10-phycoerythrin (BioLegend; clone HI10a; 1:100), respectively, were added to the media for 25 minutes on ice, washed in PBS, and sorted using FACS Vantage DIVA (Becton Dickinson).

**Matrigel/collagen assay** – 24-well plates were coated with 50 $\mu$ L of Matrigel as a bottom layer. To create the matrigel/collagen mixture, 50'000 cells in 70 $\mu$ L of media were mixed with 15 $\mu$ L of neutralization solution (100mM Hepes, pH 7.3 in 2X PBS), and 15 $\mu$ L of collagen solution (Corning 354249, 8.69mg/mL), and 100 $\mu$ L of Matrigel for a final concentration of 0.67mg/mL of collagen I. After 3 weeks, gel smears were fixed in methanol:acetone.

**Immunofluorescence** – Matrigel smears were fixed in methanol:acetone (1:1) at -20°C for 20 minutes, blocked with PBS, 5% normal goat serum, 0.1% Triton X-100, and incubated with anti-K14 (1:1000, Covance, polyclonal) and anti-K19 (1:10, Developmental Studies Hybridoma Bank, clone Troma-III) overnight at 4°C, then visualized with fluorescent secondary antibodies (Invitrogen) incubated with sections for 2 hours at room temperature. EdU was added to culture media 4h prior to fixing cells, and was imaged with A647 click reagents (Invitrogen). Cells were imaged with LSM510 confocal microscope (Carl Zeiss). Image analyses were conducted using a modified watershed method in Matlab software (Mathworks).

**Immunostaining of tissue sections-** Healthy breast tissue sections were obtained through University of California Davis in accordance with all IRB procedures. Paraffin-embedded sections were deparaffinized and antigen retrieved (Vector Laboratories) and stained with primary antibodies to K14 (1:1'000; Covance; PRB-155P; visualized with A647 Zenon probes from Invitrogen), and K19 (1:100; Abcam; AAH07628). Cells were imaged with LSM710 confocal microscope (Carl Zeiss).

**Classification using morphometric context-** Each image was represented as its Cellular Morphometric Context, which was constructed as the histogram of cellular morphometric subtypes derived from the cellular morphometric features (K14/K19 signals) through K-Means (dictionary size =1024). Homogeneous kernel map was then applied on the Cellular Morphometric Context representation, so that linear support vector machine (SVM) could be adopted for efficient and effective differentiation among age groups.



**xCELLigence analysis-** The lower xCELLigence chambers were filled with M87A media with 10% FBS and the upper chamber were filled with  $4 \times 10^5$  cells in serum-free M87 media. Cell Index (CI) and slopes were measured using the RTCA-DP instrument.

### **R code for Citrus classification-**

```
library("citrus")
# Where the data lives
dataDirectory = "C:/Users/Fanny/Documents/Cytof/The ladies/"

# List of files to be clustered= your training set
fileList1      =      data.frame(c("30_Ladies01_B10_123.fcs","20_Ladies01_E10_160.fcs",
"30_Ladies01_C5_195L.fcs",      "30_Ladies01_B7_184.fcs",      "60_Ladies01_C3_191L.fcs",
"70_Ladies01_F4_29.fcs", "70_Ladies01_E8_122L.fcs","80_Ladies01_F5_429ER.fcs"))

# List of files to be mapped= your entire test set
fileList2      =      data.frame(c("20_Ladies01_B11_407P.fcs",      "20_Ladies01_C9_399E.fcs",
"20_Ladies01_E10_160.fcs", ... include all files... "100_Ladies01_B2_805P.fcs")

# Read the data
citrus.combinedFCSSet1 = citrus.readFCSSet(dataDirectory,fileList1,fileSampleSize = 5000)
citrus.combinedFCSSet2 = citrus.readFCSSet(dataDirectory,fileList2,fileSampleSize = 5000)

# List of columns to be used for clustering
clusteringColumns = c(surface markers)

# Cluster first dataset
citrus.clustering      =      citrus.cluster(      citrus.combinedFCSSet1,      clusteringColumns,
minimumClusterSizePercent = 0.1)

# Map new data to existing clustering
```

```

citrus.mapping      =      citrus.mapToClusterSpace(citrus.combinedFCSSet.new      =
citrus.combinedFCSSet2,      citrus.combinedFCSSet.old      =      citrus.combinedFCSSet1,
citrus.clustering)

# Large Enough Clusters
largeEnoughClusters = citrus.selectClusters(citrus.clustering)

# Clustered Features and mapped features
clusteredFeatures = citrus.calculateFeatures(citrus.combinedFCSSet1, clusterAssignments =
citrus.clustering$clusterMembership, clusterIds = largeEnoughClusters)
mappedFeatures = citrus.calculateFeatures(citrus.combinedFCSSet2 ,clusterAssignments =
citrus.mapping$clusterMembership, clusterIds= largeEnoughClusters)

# Labels
# Labels for training set
labels = as.factor(c("Young", "Young", "Young", "Young", "Old", "Old", "Old", "Old"))
trainingLabels = as.factor(c("Young", "Young", "Young", "Young", "Old", "Old", "Old", "Old"))
#Labels for test set
testingLabels = as.factor(c(rep("<30",16),rep(">30<50",13),rep(">50",15)))

# Build Endpoint Model
citrus.endpointModel = citrus.buildEndpointModel(clusteredFeatures, trainingLabels)

# Calculate regularization thresholds
regularizationThresholds = citrus.generateRegularizationThresholds( features= clusteredFeatures,
labels=trainingLabels, modelType="pamr",family="classification")

# Calculate CV Error rates
thresholdCVRates = citrus.thresholdCVs.quick( modelType="pamr", features=clusteredFeatures,
labels=trainingLabels, regularizationThresholds,family="classification")

```

```
# Get pre-selected CV Minima
cvMinima = citrus.getCVMinima("pamr",thresholdCVRates)

# Predict lables of testing data at CV.1se
predictions = citrus.predict( citrus.endpointModel, newFeatures=mappedFeatures)
[,cvMinima$cv.1se.index]

# Contingency Table of results
table(predictions,testingLabels)
```
